# Supplementary material for: Clinical Features, Disease Burden and Impact on Quality of Life in Patients with Mitochondrial Encephalomyopathy
Source: Research Square preprint supplement (doi:10.21203/rs.3.rs-5916685/v1), 2025-01-31
Supplement: Supplementary file 1 [file 000b417022f7485c4a2cfe97.xlsx]

## Sheet: ME
Table 2 Genetic variants and clinical features
ID	Sex	Disease	ME type	Variant and location	First reported symptom	Main symptoms	Prognosis/Outcome
P1	Male	MERRF	mNDA	MT-TK m.8344A>G	Motor retardation	Seizures, motor retardation, weakness, dysarthria, mental retardation, recurrent pneumonia, malnutrition	Stable
P2	Male	LS	nDNA	PDHA1 c.1132C>T	Motor retardation, facial weakness	Motor retardation, seizures, limb weakness, lung infections	Death
P3	Male	ADPEO	nDNA	C10orf2 c.1133T>CT	Muscle weakness	muscle weakness, respiratory symptoms, malnutrition	Exacerbated
P4	Male	COXPD1	nDNA	GFM1 c.688G>A	Delayed motor development	Seizures, delayed motor development, abnormal liver function, malnutrition, gastrointestinal dysfunction, lung infections	Improved
P5	Male	LHON	mNDA	MT-ND1 m.3497C>T	Motor retardation, facial weakness	Motor retardation, headache, muscle weakness, muscle atrophy, mental obtundation	Death
P6	Female	MELAS	mNDA	MT-TL1 m.3243A>G	Limb weakness, delayed motor development	Stroke-like episodes, delayed motor development, limb weakness, hypotonia, amyotrophy, malnutrition, dysarthria, mental retardation, gastrointestinal disorders, lung infection, liver dysfunction, cardiac insufficiency	Exacerbated
P7	Male	COQ10D7	nDNA	COQ4 c.370G>A	Seizures	seizures, delayed motor development, dysarthria, mental retardation, hearing impairment, malnutrition, recurrent lung infections, increased muscle tone, gastrointestinal dysfunction	Exacerbated
P8	Female	COQ10D7	nDNA	COQ4 c.370G>A	Seizures, delayed motor development	Seizures, delayed motor development, dysarthria, mental retardation	Stable
P9	Female	LS	mNDA	MT-ND3 m.10191T>C	Motor retardation, facial weakness	Motor retardation, facial weakness, short stature, seizures, mental retardation	Death
P10	Male	EMPF1	nDNA	DNM1L c.2060_2062delTAG	Motor retardation	seizures, motor retardation, dysarthria, mental retardation, muscle weakness	Exacerbated
P11	Male	COXPD10	nDNA	MTO1 c.334A>G	Lung infections	Delayed motor development, mental retardation, lung infection, gastrointestinal dysfunction, elevated blood glucose, muscle weakness, cardiac insufficiency	Death
P12	Female	COXPD10	nDNA	MTO1 c.334A>G	Delayed motor development, limb weakness	Delayed motor development, dysarthria, mental retardation, limb weakness, malnutrition	Improved
P13	Male	LS	mNDA	MT-ND1-1 del	Seizures	Seizures, dysarthria, motor retardation, lung infections	Improved
P14	Male	LS	nDNA	PC c.1639C>T	Gastrointestinal dysfunction	dysarthria, delayed motor development, mental retardation, limb weakness, feeding difficulties	Improved
P15	Male	LS	mNDA	MT-ND5 m.13513G>A	Delayed motor development, muscle weakness	dysarthria, delayed motor development, mental retardation, limb weakness, malnutrition, seizures, lung infections	Death
P16	Female	EMPF1	nDNA	DNM1L c.1040C>G	Motor retardation, limb weakness	Seizures, motor retardation, limb weakness, dysarthria, mental retardation, short stature, gastrointestinal dysfunction	Death
P17	Female	MC1DN20	nDNA	ACAD9 c.1237G>A	Delayed motor development	Pulmonary infection, delayed motor development, cardiac insufficiency/hypertrophic cardiomyopathy	Death
P18	Male	ECHS1D	nDNA	ECHS1 c.7G>C	Delayed motor development	Delayed motor development, dysarthria, limb weakness, hearing impairment, malnutrition, visual impairment, mental retardation	Stable
P19	Female	COXPD1	nDNA	GFM1 c.688G>A	Gastrointestinal dysfunction, mental obtundation	Gastrointestinal dysfunction (feeding difficulties), mental obtundation, malnutrition, abnormal liver function, muscle weakness (limbs)	Death
P20	Male	MELAS	mNDA	MT-TL1 m.3243A>G	Headache, limb weakness	Limb weakness, headache, visual disturbances, stroke-like attacks, mental retardation, dysarthria, motor retardation, hypertrophic cardiomyopathy	Death
P21	Male	LS	mNDA	MT-ND3 m.10191T>C	Headache, seizures	Seizures, headaches, motor retardation	Exacerbated
P22	Male	MELAS	mNDA	MT-TL1 m.3243A>G	Headaches, visual impairment, hearing impairment	Headache, visual impairment, hearing impairment, seizures, mental retardation, mild depression, gastrointestinal disorders	Improved
P23	Female	MELAS	mNDA	MT-TL1 m.3243A>G	Gastrointestinal dysfunction, headache	Seizures, malnutrition, mental retardation, headache, gastrointestinal dysfunction, hearing impairment, limb weakness, visual impairment, renal insufficiency	Stable
P24	Male	MERRF	mNDA	MT-TK m.8340A>G	Delayed motor development	Seizures, muscle weakness/hypotonia, delayed motor development, dysarthria, malnutrition, mental retardation, respiratory infections	Stable
P25	Male	COXPD20	nDNA	VARS2 c.1850C>T	infection/respiratory symptoms, mental obtundation	Respiratory symptoms/pulmonary infection, elevated blood glucose, seizures, hypotonia, cardiac insufficiency	Death
P26	Male	MELAS	mNDA	MT-TL1 m.3243A>G	Delayed motor development, dysarthria	Mental retardation, delayed motor development, dysarthria, short stature, malnutrition, limb weakness, seizures, gastrointestinal dysfunction, lung infection, hearing impairment, elevated blood glucose	Death
P27	Female	MELAS	mNDA	MT-CYB-1 del	Seizures	Pulmonary infection, seizures, dysarthria, motor retardation, limb weakness, mental obtundation	Not applicable
Notes: adPEO: autosomal dominant progressive external ophthalmoplegia; COQ10D: Primary coenzyme Q10 deficiency; COXPD: Combined oxidative phosphorylation deficiency; ECHSID: Mitochondrial short-chain
enoyl-coA hydratase 1 deficiency; EMPF1: Encephalopathy due to defective mitochondrial and peroxisomal fission 1; LHON: Leber’s hereditary optic neuropathy; LS: Leigh syndrome; MCIDN2O; Mitochondrial complex 1
deficiency, nuclear type 20; MELAS: Mitochondrial encephalopathy, lactic acidosis, ans stroke-like episodes; ME: Mitochondrial encephalomyopathy; MERRF: Myoclonic epilepsy with ragged red fibers;
mDNA: Mitochondrial DNA; nDNA: Nuclear DNA
